# Supplementary material
Source: Research Square preprint supplement (doi:10.21203/rs.3.rs-9334057/v1)
Supplement: Supplementary file 1 [file 94ef7b3b59d9d98ad18b9134.docx]

**Fig.S3 Sensitivity Analysis: Odds Ratios for Network Meta-Analysis Comparisons in Pediatric Populations**

**
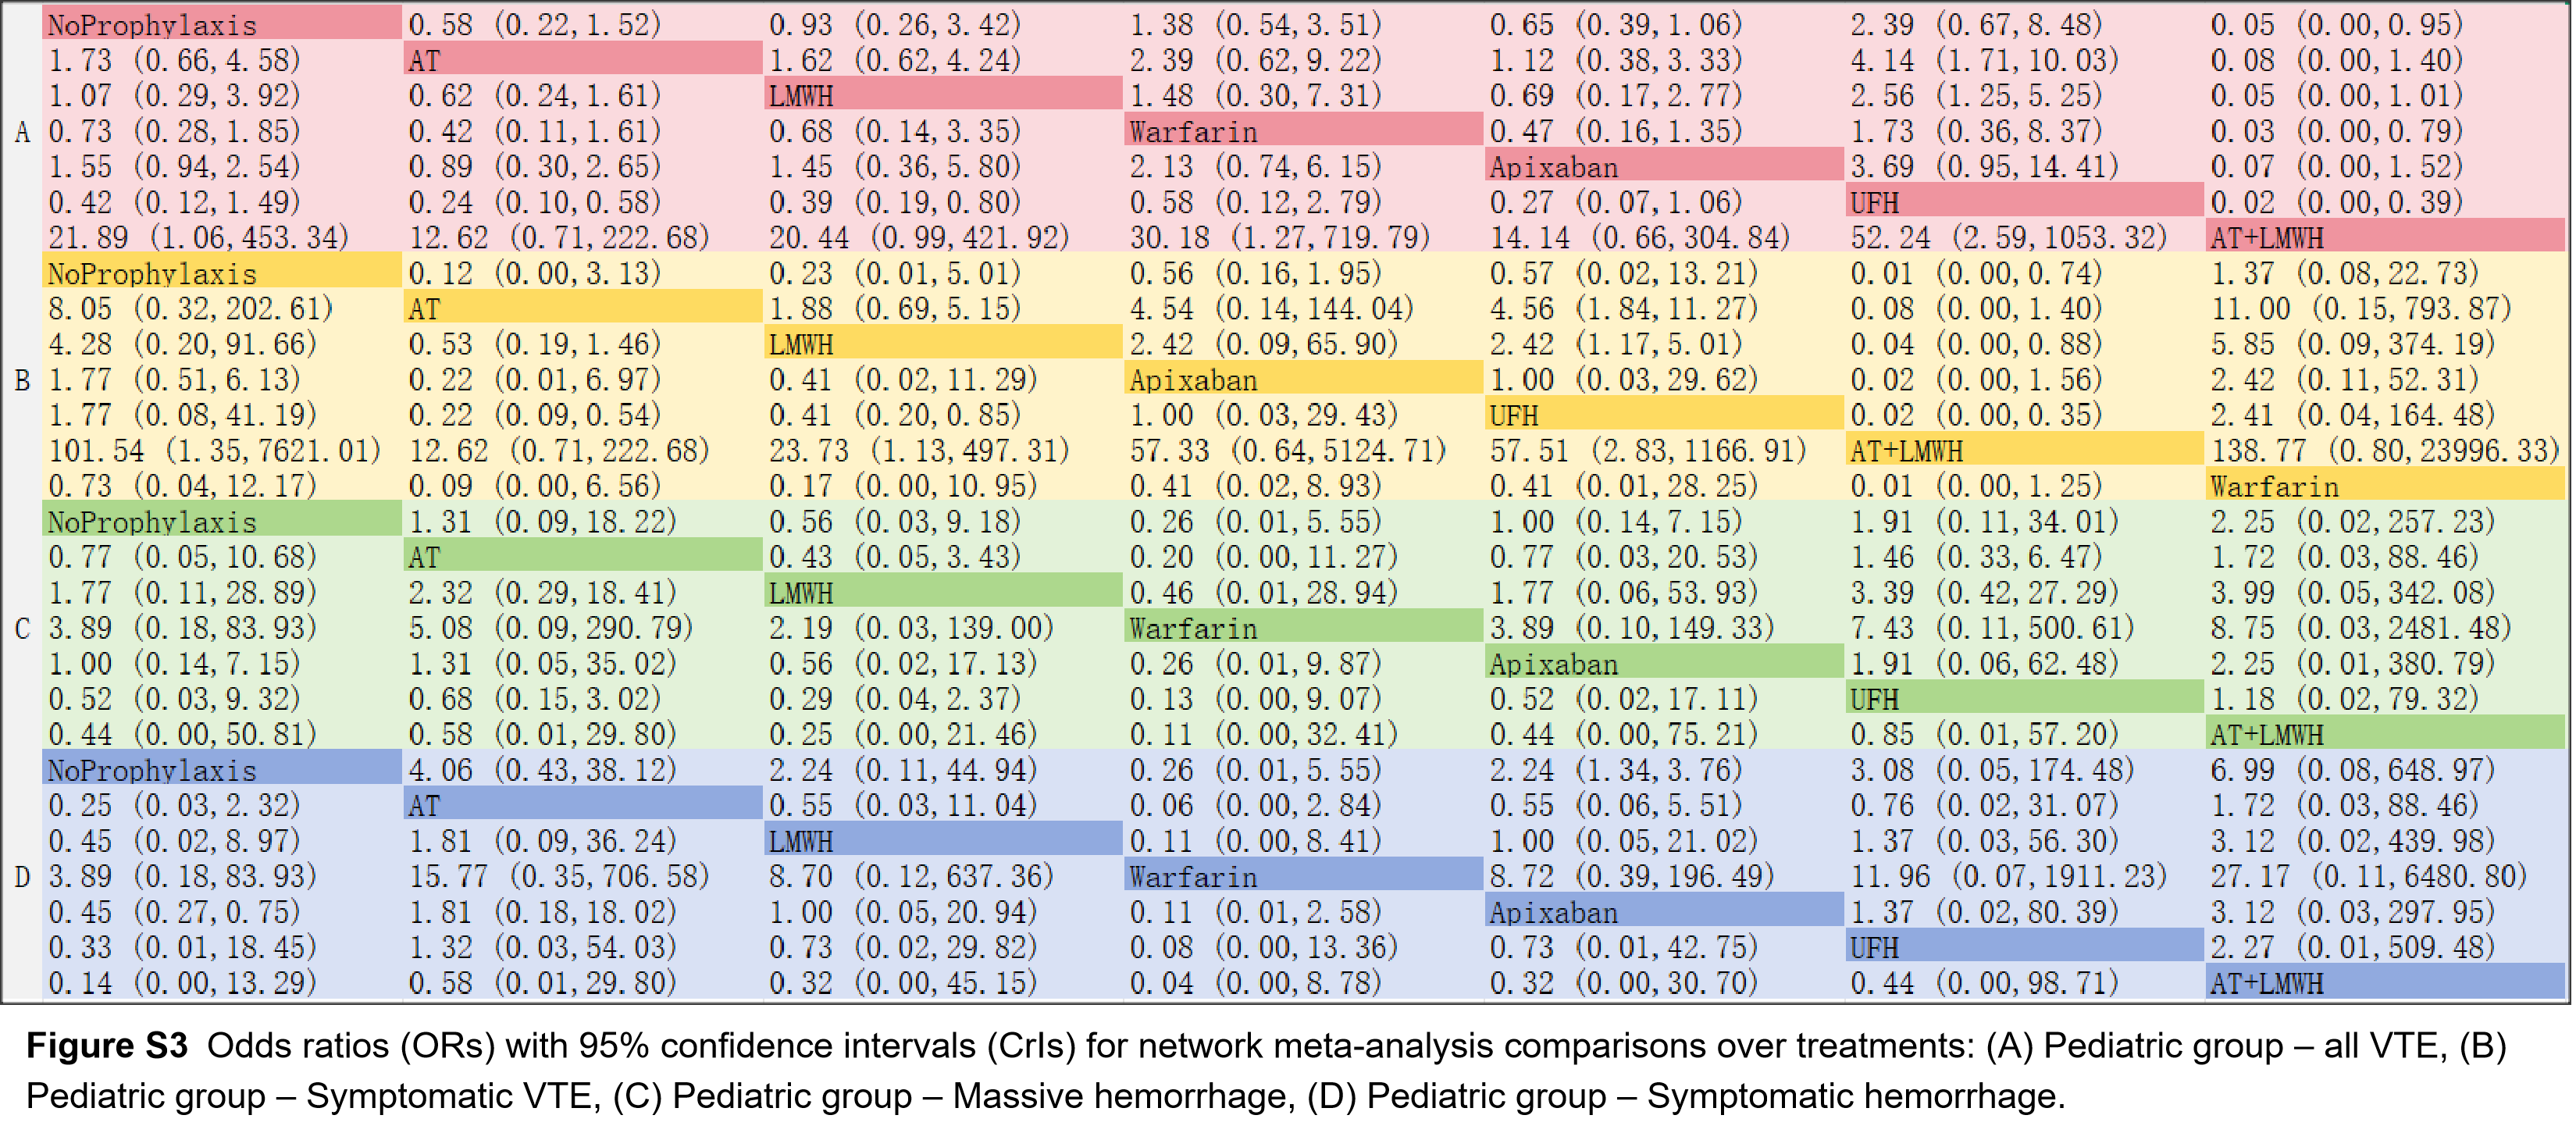
**

**Fig.S4 Sensitivity Analysis: Ranking Probabilities (SUCRA) for Outcomes in Pediatric Populations**

**
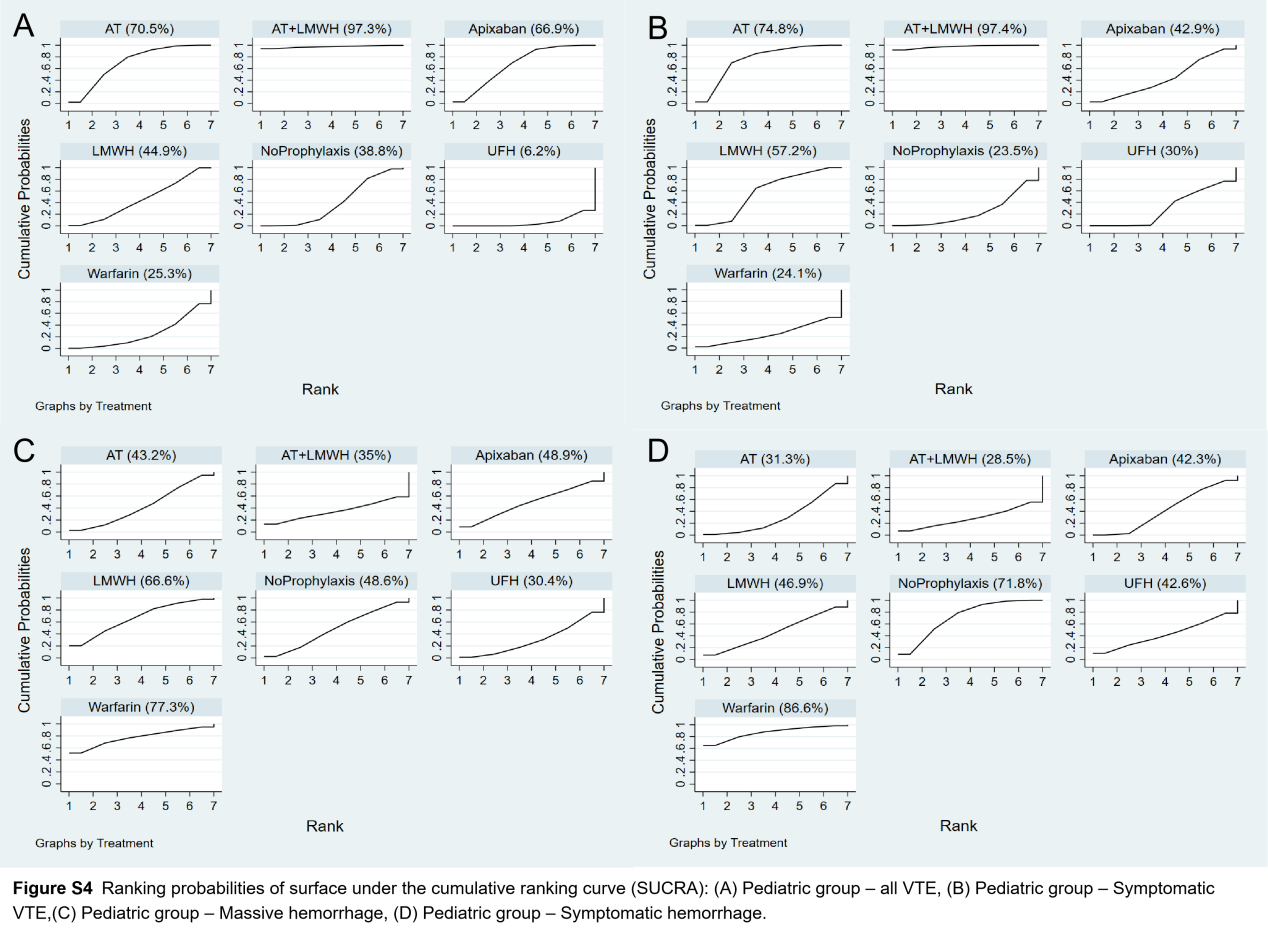
**

**Fig. S5 Sensitivity Analysis: Forest Plots of Network Meta-Analysis in Adult Populations**

**
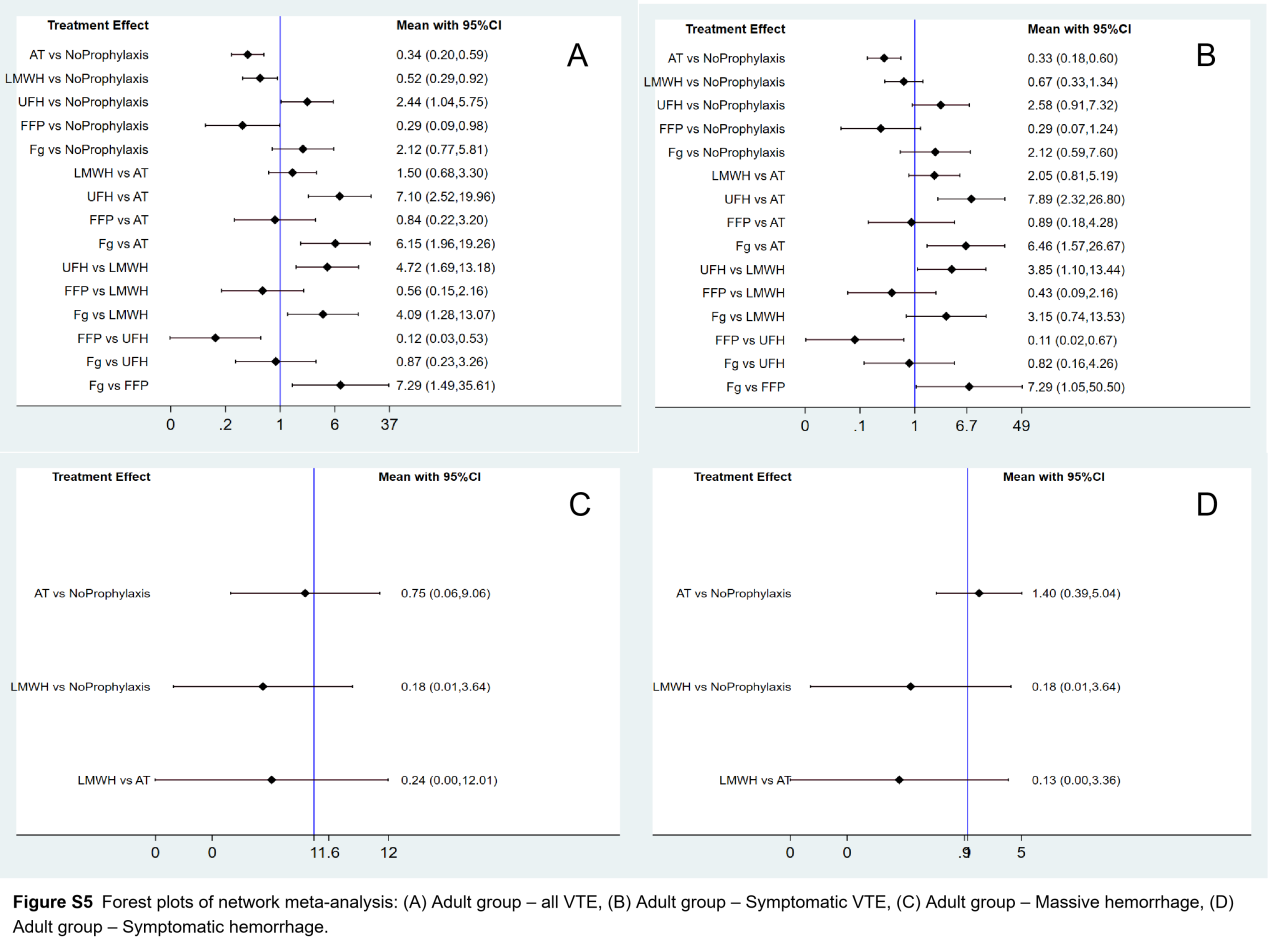
**

**Fig. S7 Funnel Plot for Publication Bias in the Pediatric Group**

**
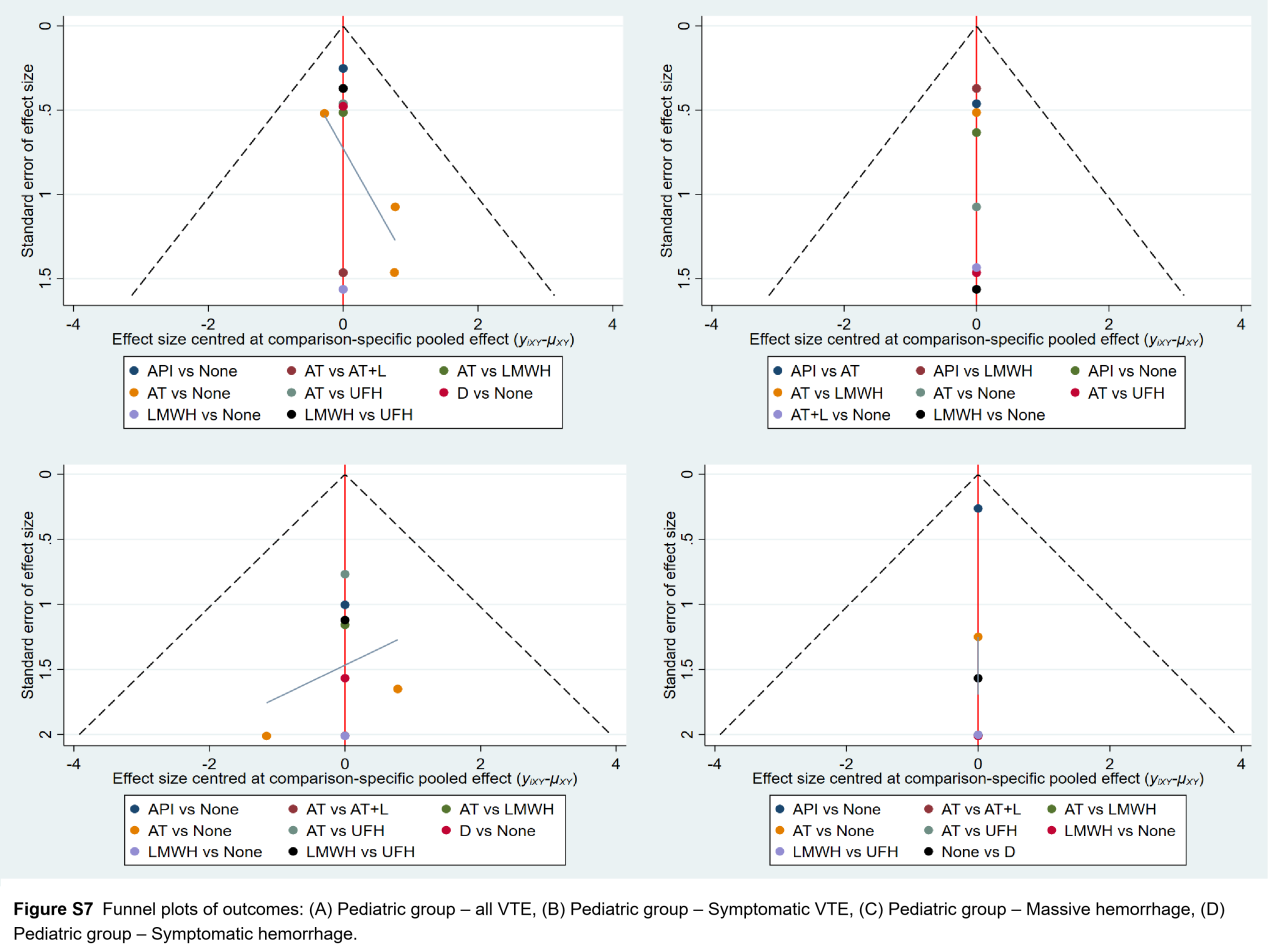
**

**Fig. S8 Funnel Plot for Publication Bias in the Adult Group**

**
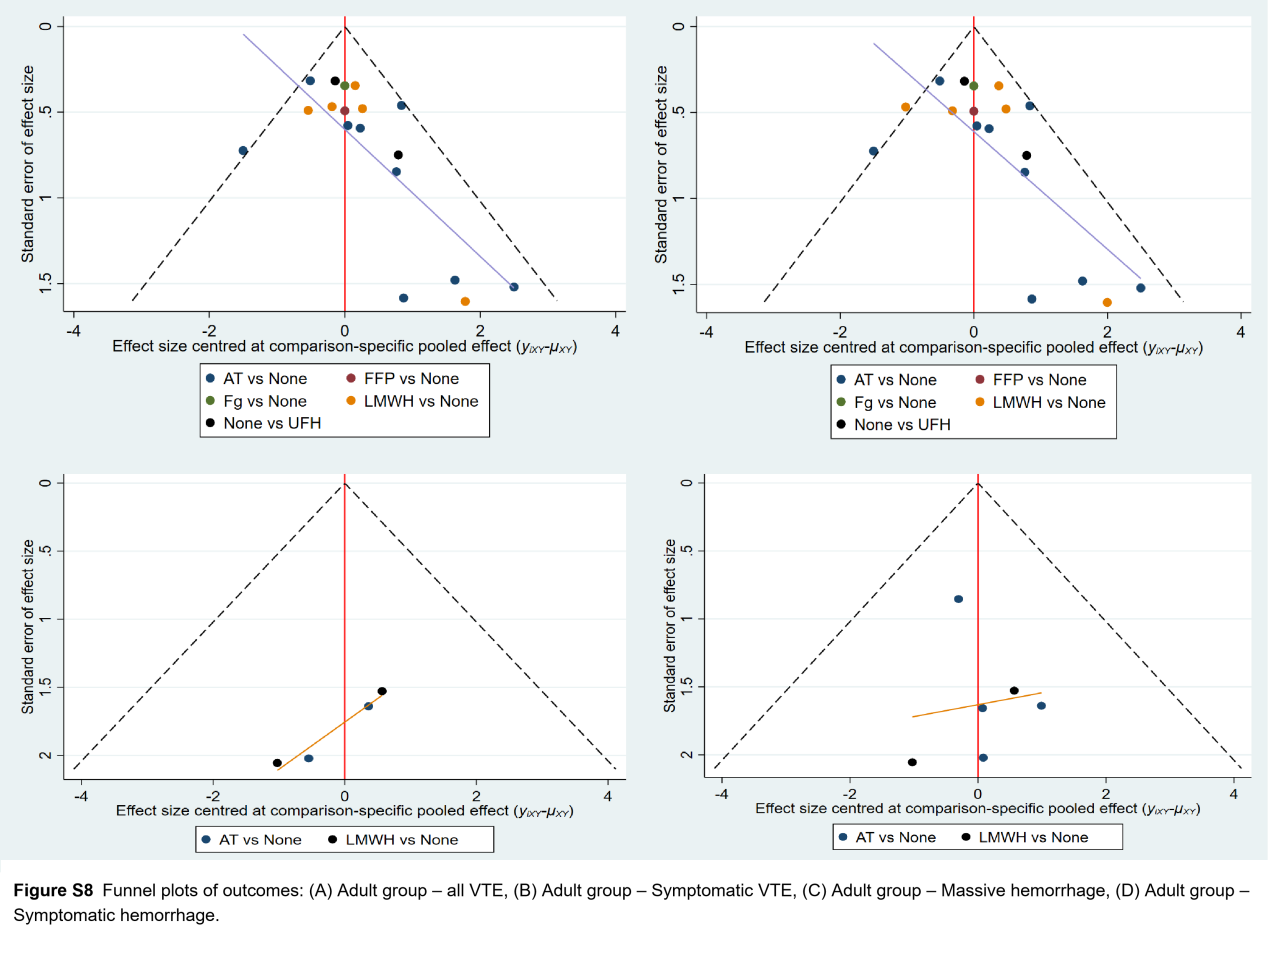
**
